# Supplementary material
Source: Royal Society of Chemistry journal article supplement (doi:10.1039/d6fo00370b)
Supplement: d6fo00370b1.pdf [file d6fo00370b1.pdf]

## Supplementary material

**Supplementary Table 1** Nutritional composition and physicochemical index of fermented goat milk powder.

| Nutrients             | Content | Physicochemical indicators    | Content                   |
|-----------------------|---------|-------------------------------|---------------------------|
| lactose, %            | 43.2    | reconstituted milk pH value   | 6.0-6.5                   |
| Crude fat, %          | ≥ 26    | Restored lactic acidity (° T) | ≤ 10.0-15.0               |
| Crude protein, %      | ≥ 24    | Moisture, %                   | ≤ 4                       |
| Coarse ash content, % | ≤ 7.5   | Insolubility index, mL        | ≤ 1.0                     |
| Taurine mg / 100 g    | 45.2    | Chlorine mg / 100g            | ≤ 1800                    |
| Calcium mg / 100 g    | 790     | bacteria live count (CFU/g)   | 1×10 <sup>7</sup> CFU / g |
| Zinc mg / 100 g       | 1.92    |                               |                           |
| Iron mg / 100 g       | 0.17    |                               |                           |
| Selenium mg / 100 g   | 4.2     |                               |                           |

**Supplementary Table 2** Primer pairs for RT-qPCR analysis.

| Gene    | Sequence (5' to 3')         |
|---------|-----------------------------|
| β-actin | F: CGTGC GTGACATTAAGGAGAAG  |
|         | R: GCTCGTAGCTCTTCTCCAAGTCC  |
| GPX4    | F: GCCGTCTGAGCCGCTTACTT     |
|         | R: GATGCACACGAAACCCCTGT     |
| ACSL4   | F: GAAAGCAA ACTGAAGGCGGC    |
|         | R: AATGGCCATGTCTGAAGGGG     |
| ALOX15  | F: ATGCAGCTTTCTGACCACC      |
|         | R: CAGATGAAGTTTTCTCCCTTTGAA |
| LPCAT3  | F: CTCCATCTTCCTGGGCTACC     |
|         | R: CACCGGTGGCTGTGTAGTAA     |
| NOX1    | F: CACCAATGCC CAGGATCGAG    |
|         | R: TGGAAGCAAAGGGAGTGACC     |
| PTGS2   | F: TGAGTACCGCAAACGCTTCT     |
|         | R: CAGCCATTCCTTCTCTCCTGT    |

A

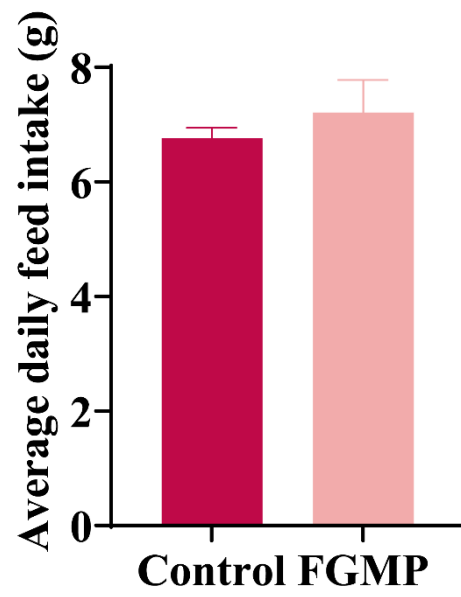

**Supplementary Fig. 1 Average daily food intake of mice.** (A) Average daily food intake in Control and FGMP-fed mice during the 35-day experimental period.

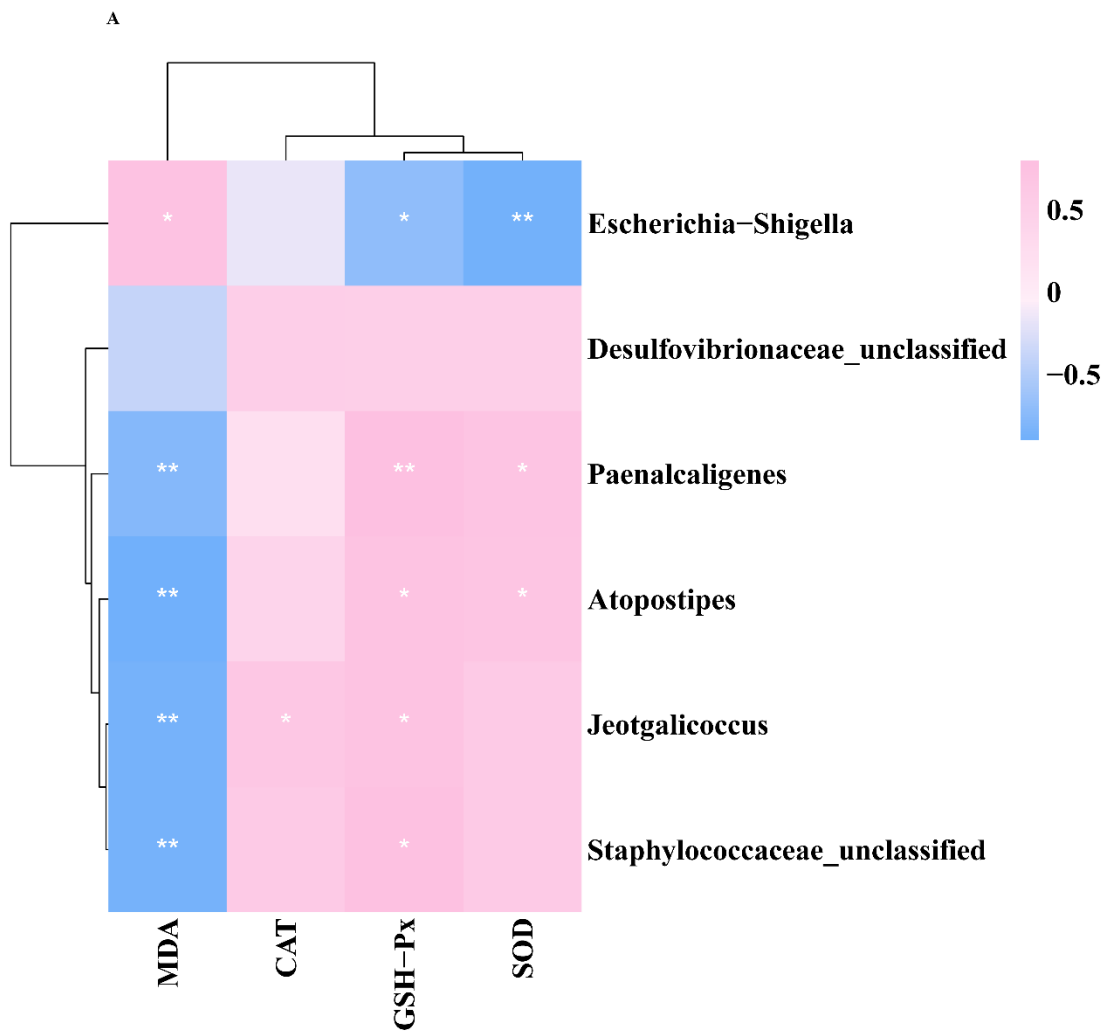

**Supplementary Fig.2 Correlation analysis between significantly altered gut bacterial genera and systemic antioxidant indices in mice fed fermented goat milk powder (FGMP).**

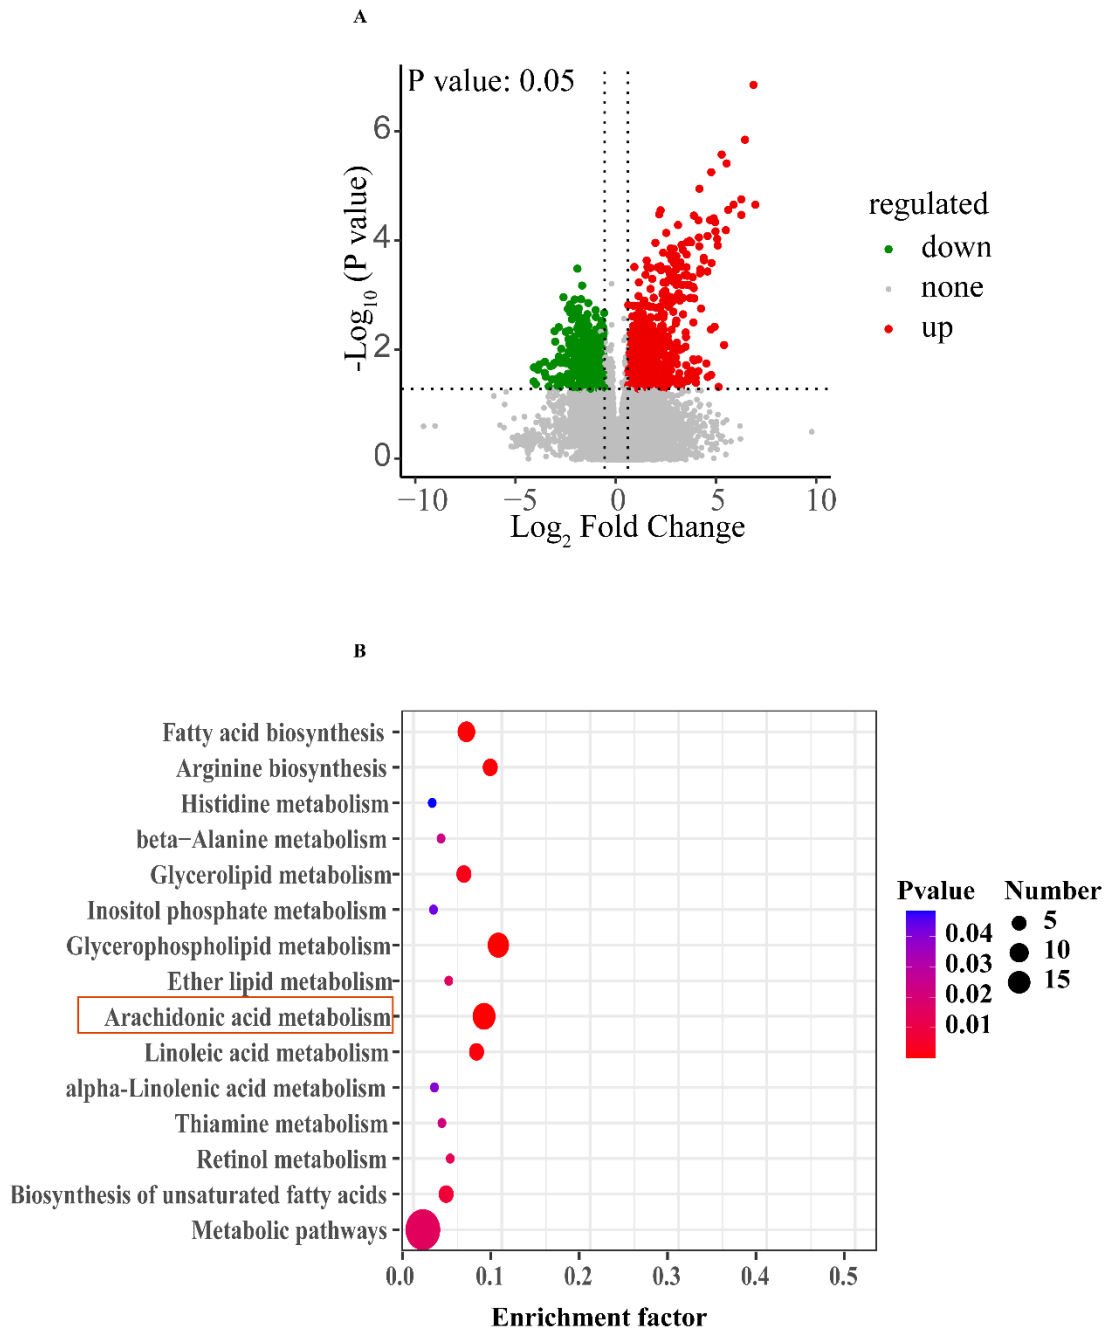

**Supplementary Fig.3 Metabolomic analysis of mice intestinal contents.** (A) Volcano plot of differentially abundant metabolites. (B) KEGG pathway enrichment analysis, revealing significant enrichment in metabolic pathways including fatty acid and arachidonic acid metabolism.

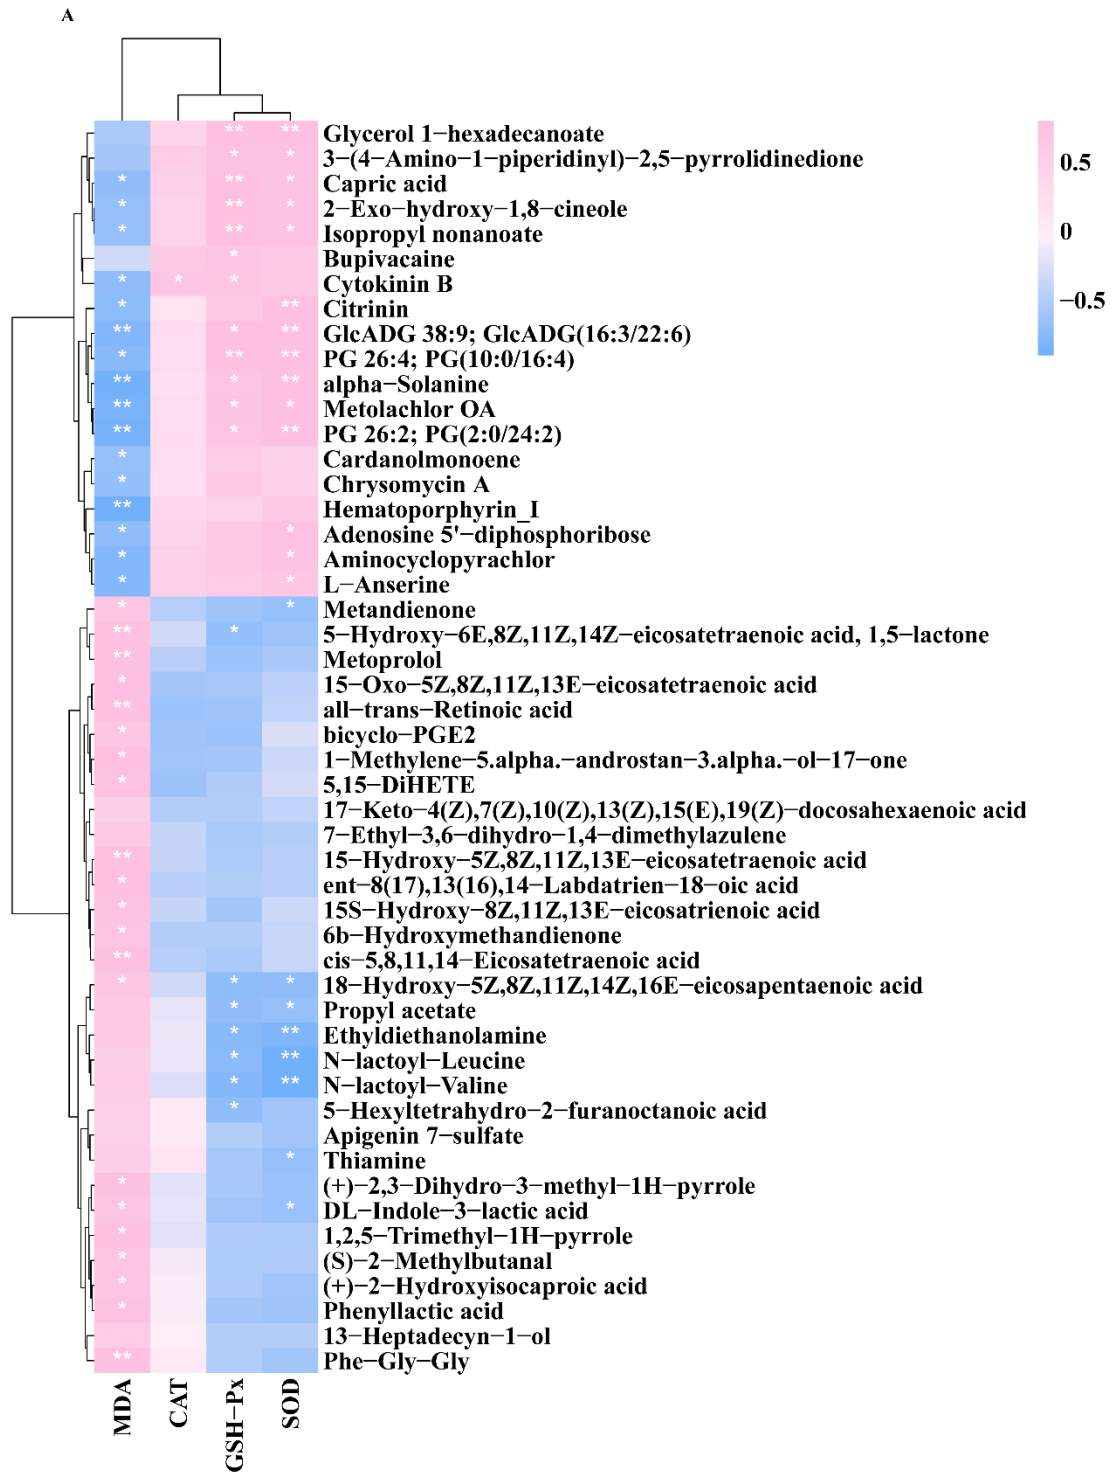

Supplementary Fig.4 Correlation analysis between differential intestinal metabolites and serum antioxidant markers.
